# Supplementary material for: Epidemiological Features of Nontyphoidal Salmonella Infections Reported to Foodborne Disease Surveillance System in China, 2013–2022
Source: Research Square preprint supplement (doi:10.21203/rs.3.rs-5977302/v1), 2025-02-12
Supplement: Supplementary file 1 [file ac8671dba6ef38a513e05778.docx]

SUPPLEMENTAL MATERIALS


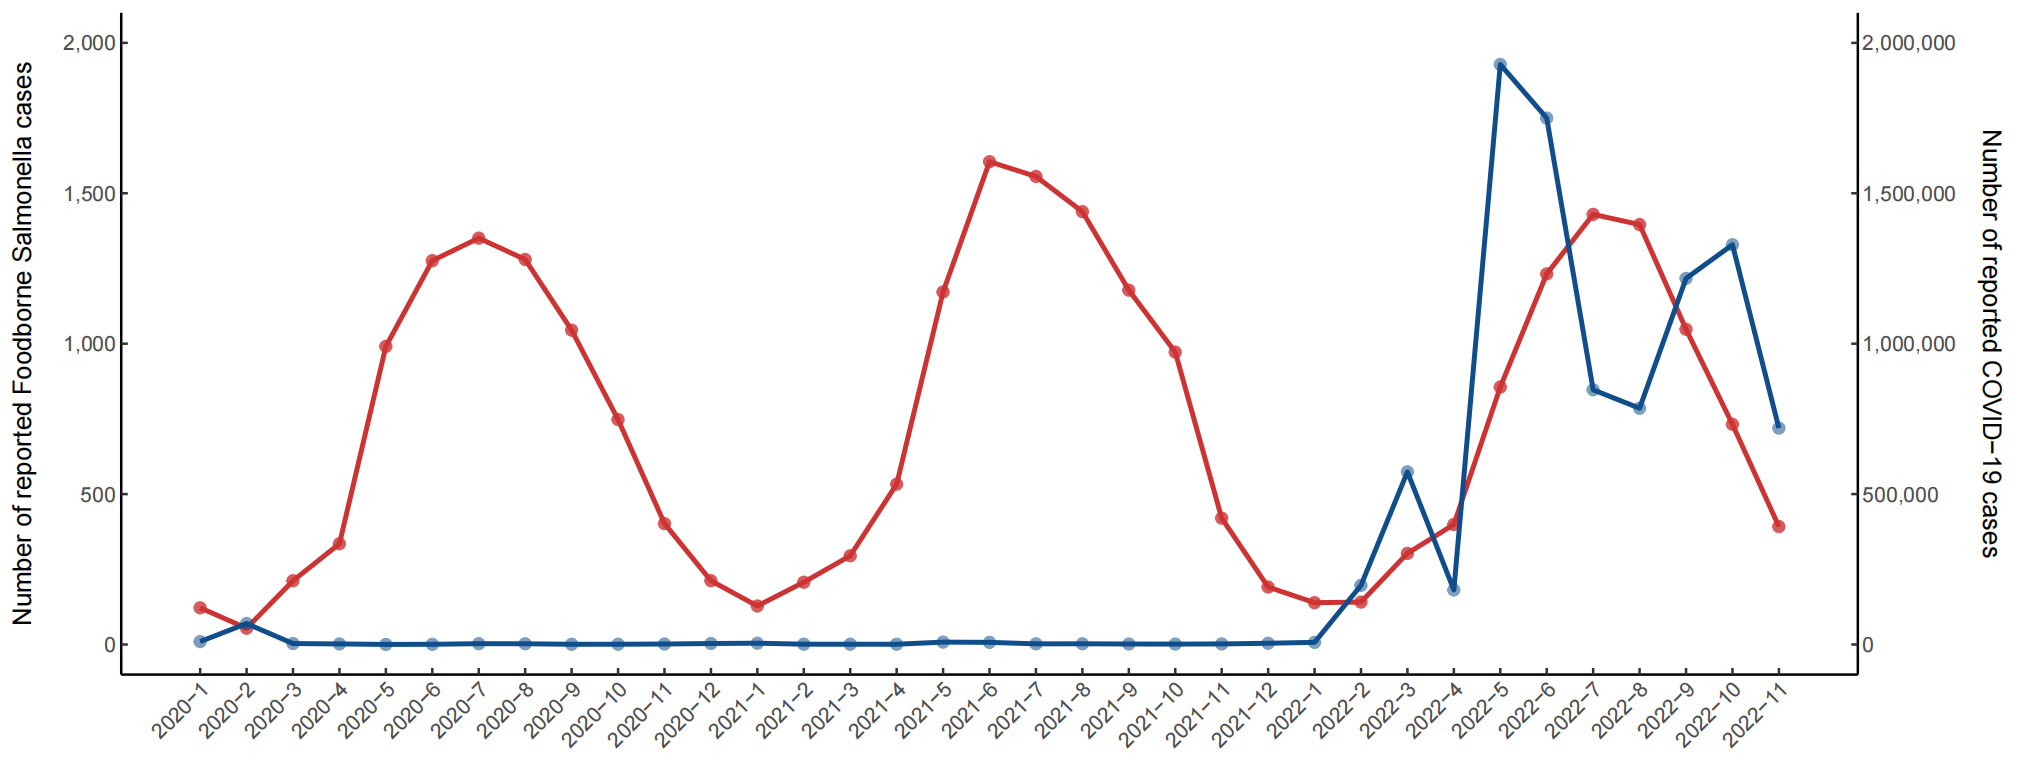


Figure S1. Correlation between number of reported NTS and number of reported covid-19 cases in China, 2013–2022.


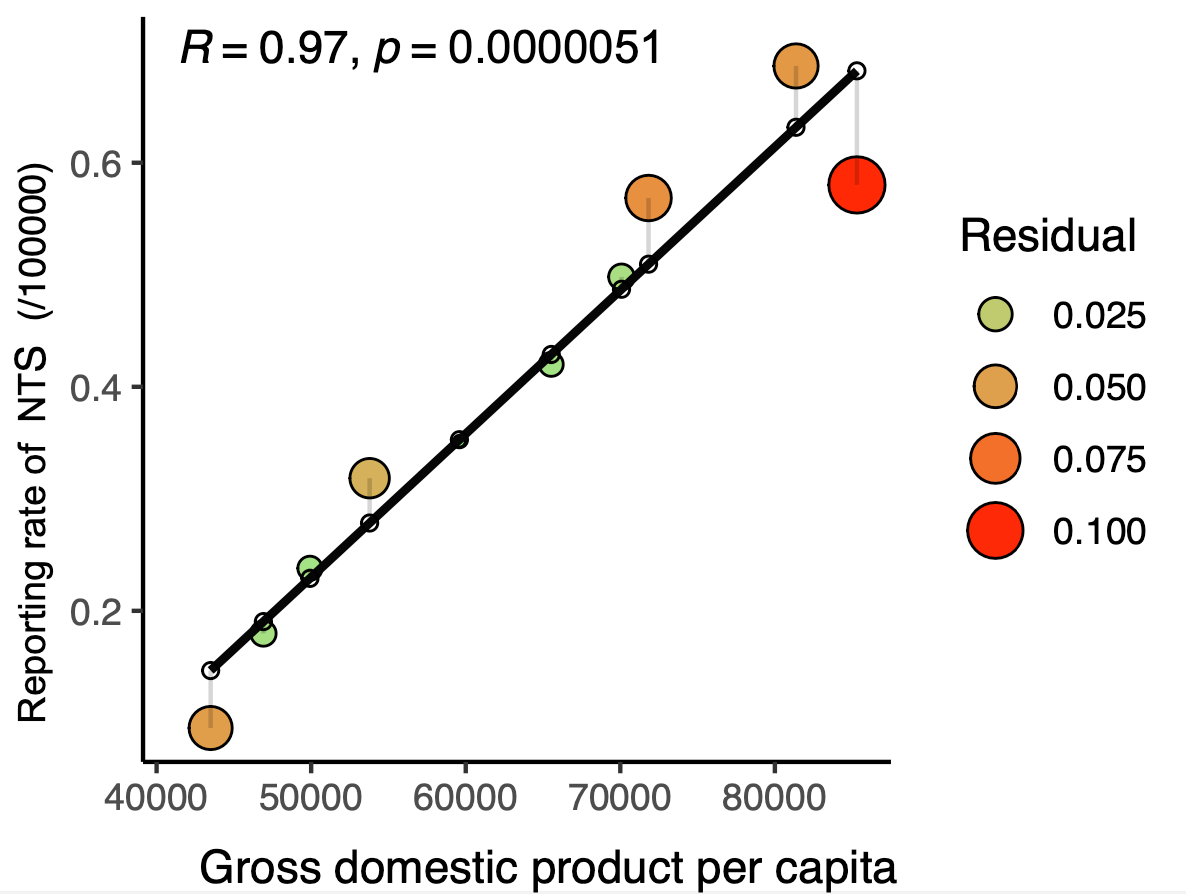


Figure S2. Correlation between reporting rate of NTS and GDP in China, 2013–2022.
